# Supplementary material for: Ultra-durable high-performance CoMo-MCA/Fe-NWs/NF heterostructures for industrial-grade current density seawater splitting
Source: Royal Society of Chemistry journal article supplement (doi:10.1039/d4ta05175k), 2024-01-01
Supplement: d4ta05175k1.pdf [file d4ta05175k1.pdf]

## Supporting Information

### Ultra-durable high-performance CoMo-MCA/Fe-NWs/NF heterostructures for industrial-grade current density seawater splitting

Abhishek Meena<sup>a</sup>, Atanu Jana<sup>a</sup>, Giho Shin<sup>a</sup>, Aditya Narayan Singh<sup>b</sup>, Hyunsik Im<sup>a</sup>, Jae-Won Jang<sup>c</sup>, and Sangeun Cho<sup>\*a</sup>

<sup>a</sup>*Division of System Semiconductor, College of AI Convergence, Dongguk University, Seoul, Republic of Korea*

<sup>b</sup>*Department of Energy and Materials Engineering, Dongguk University, Seoul, 04620, Republic of Korea*

<sup>c</sup>*Division of Physics and Semiconductor Science Dongguk University 30, Pildong-ro 1-gil, Jung-gu, Seoul, 04620, Rep. of Korea*

\*email: sangeun.c@dongguk.edu

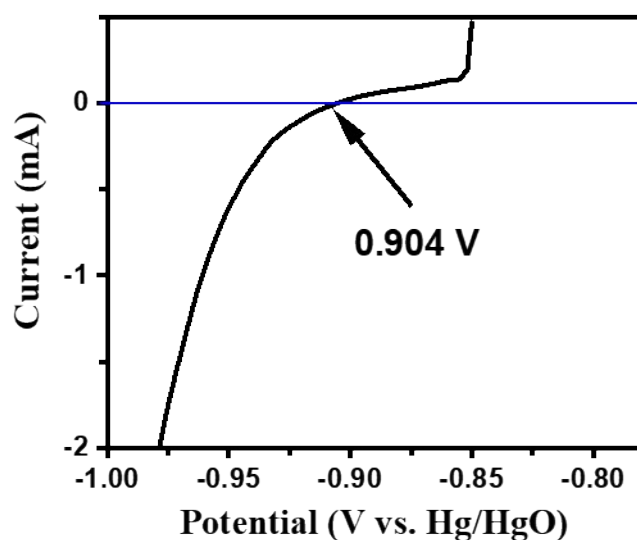

**Fig. S1** Calibration of the Hg/HgO reference electrode. The Hg/HgO electrode is used as the reference for all electrochemical measurements in alkaline media. Calibration to the RHE is performed in a high-purity H<sub>2</sub>-saturated electrolyte with Pt wire as the working electrode in 1 M KOH. LSV is conducted at a scan rate of 1 mV s<sup>-1</sup>, assuming the HER potential to be at 0 mA. Therefore, in 1 M KOH,  $E(\text{RHE}) = E(\text{Hg}/\text{HgO}) + 0.904 \text{ V}$ .

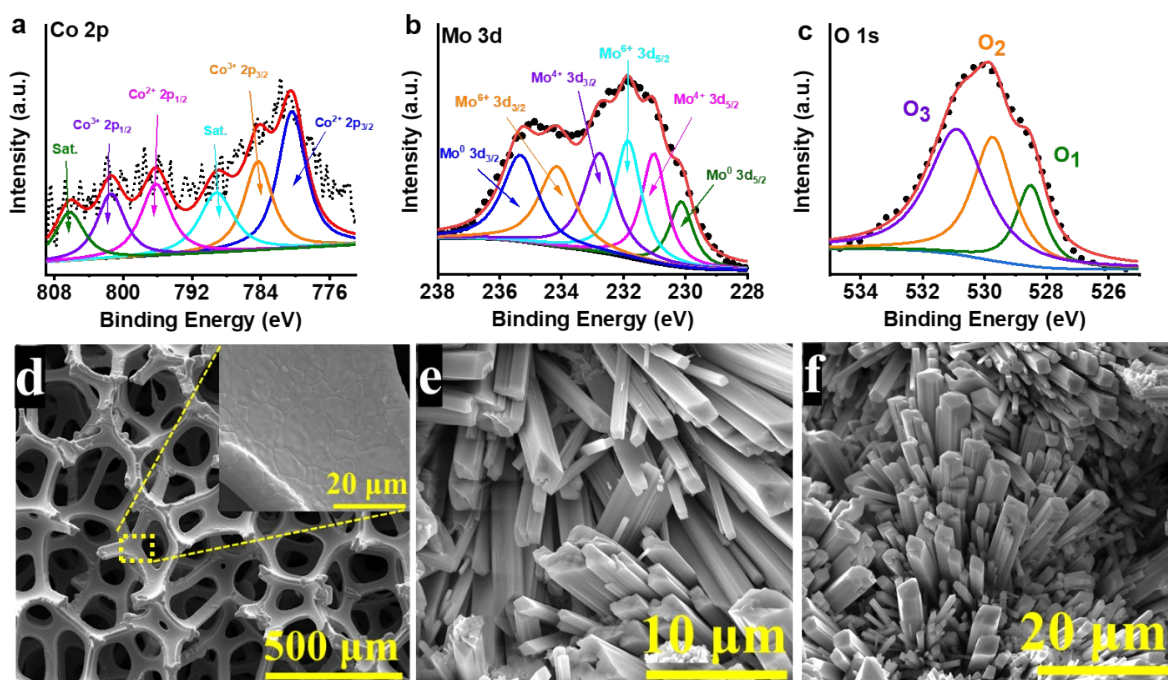

**Fig. S2** Structural analysis of the synthesized CoMo-MCA/NF electrocatalysts: (a–c) High-resolution XPS spectra: Co 2p (a), Mo 3d (b), and O 1s (c). (d) FE-SEM images of bare NF. (e and f) FE-SEM images of CoMo-MCA/NF.

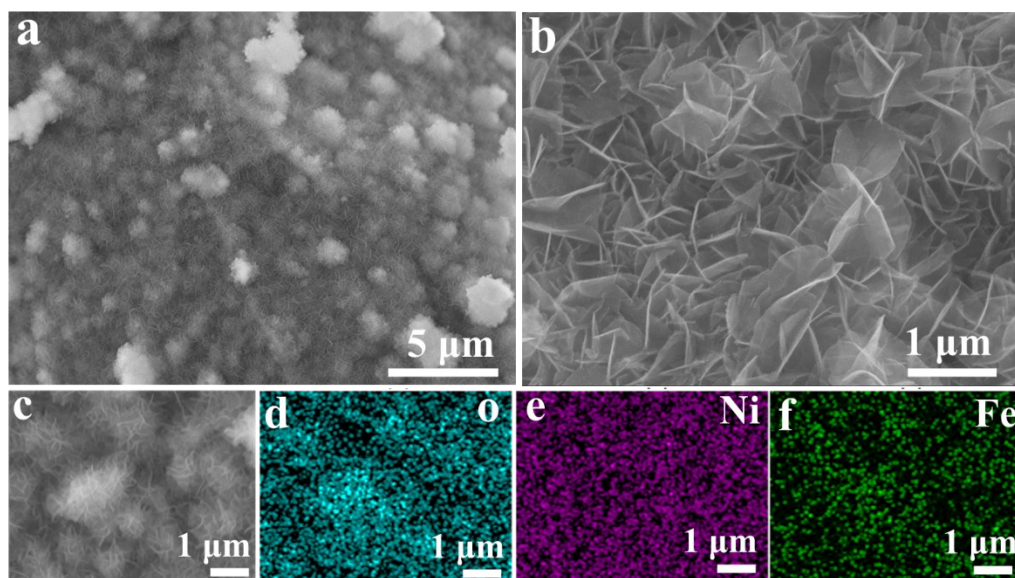

**Fig. S3** Structural characterization of Fe-NS/NF. (a and b) FE-SEM images at different magnifications. (c–f) FE-SEM EDS elemental mapping.

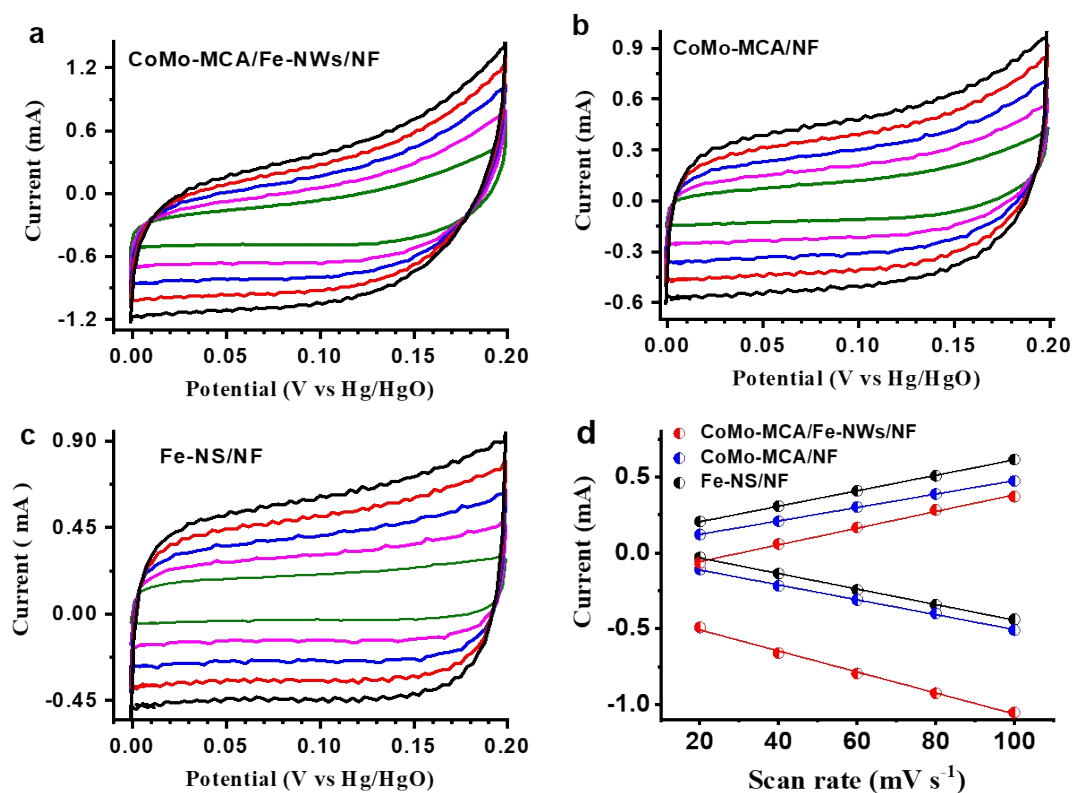

**Fig. S4** Capacitive current in the potential window as a function of different scan rates (20, 40, 60, 80, and 100 mV s<sup>-1</sup>), with the average linear slope corresponding to the double-layer capacitance ( $C_{dl}$ ). (a) CoMo-MCA/Fe-NWs/NF, (b) CoMo-MCA/NF, and (c) Fe-NS/NF.

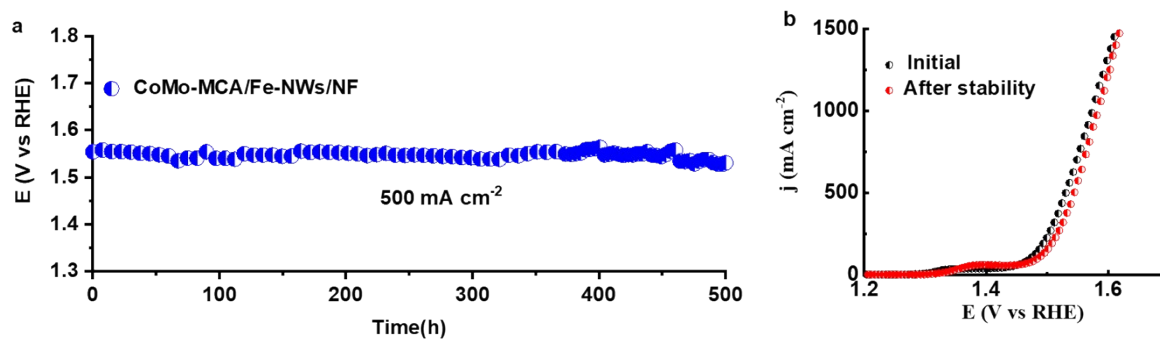

**Fig. S5** Electrocatalytic OER activities in 1M KOH. (a) Long-term stability test (500 h) at a constant 500 mA cm<sup>-2</sup> for the CoMo-MCA/Fe-NWs/NF. (b) steady-state polarization curves before and after the 500-h stability test.

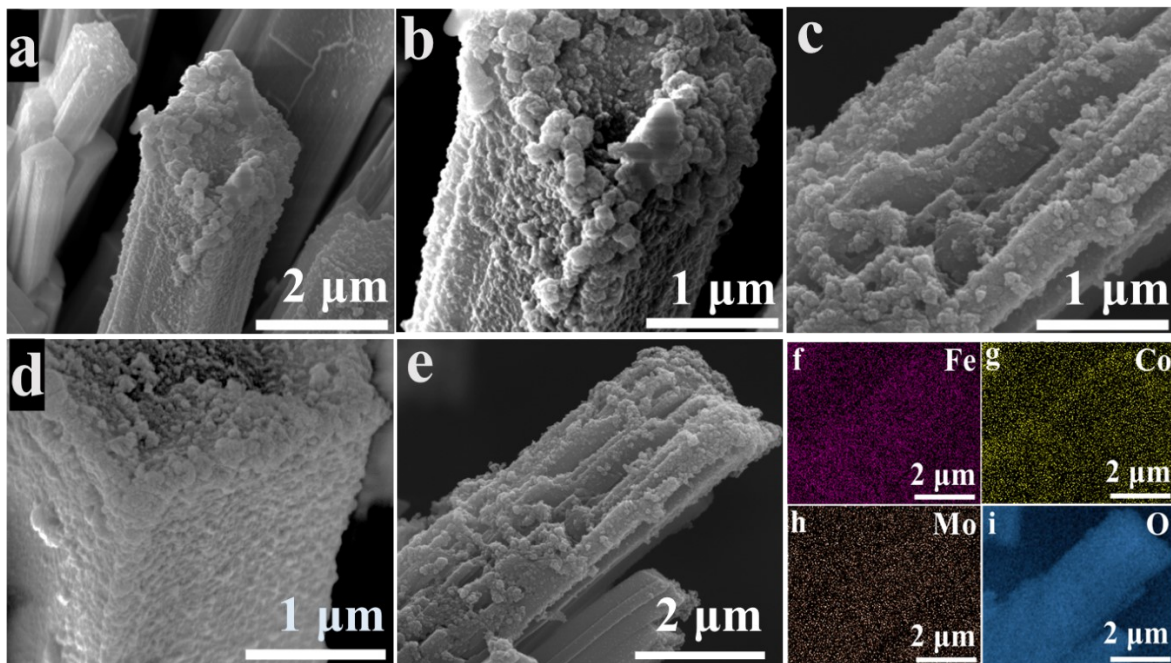

**Fig. S6** Structural characterization of CoMo-MCA/Fe-NWs/NF after stability testing. (a–d) FE-SEM images at different magnifications. (e–i) FE-SEM EDS elemental mapping.

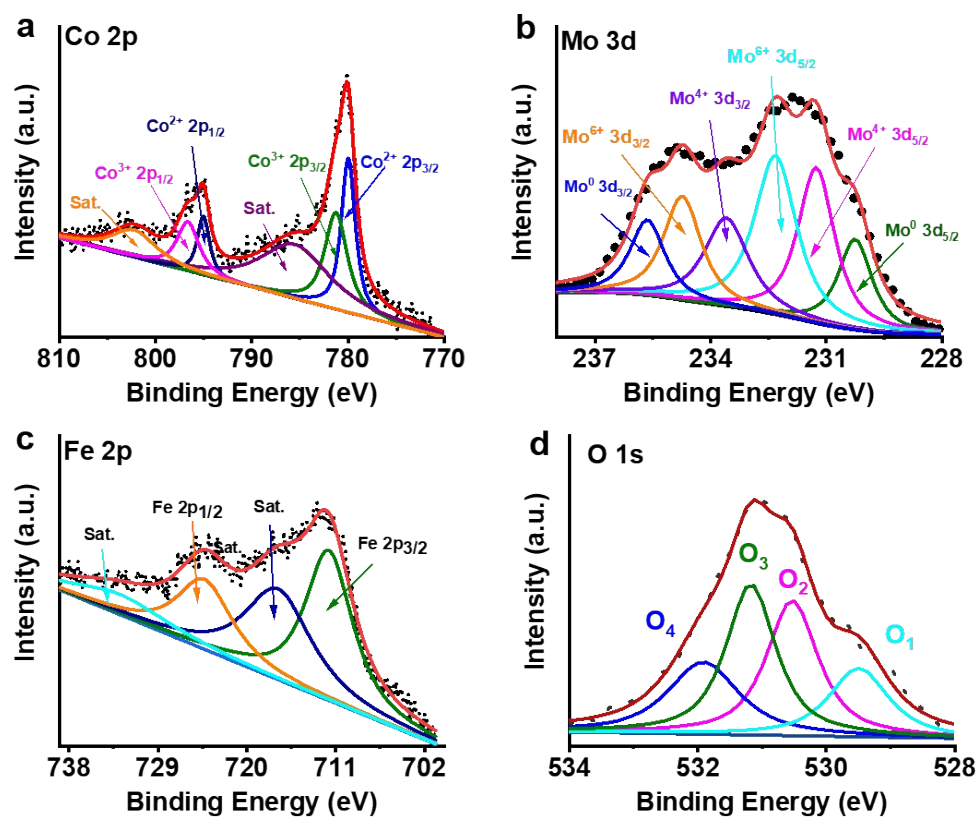

**Fig. S7** (a-d) High-resolution XPS spectra for (a) Co 2p, (b) Mo 3d, (c) Fe 2p, and (d) O 1s from the hybrid CoMo-MCA/Fe-NWs/NF after stability testing.

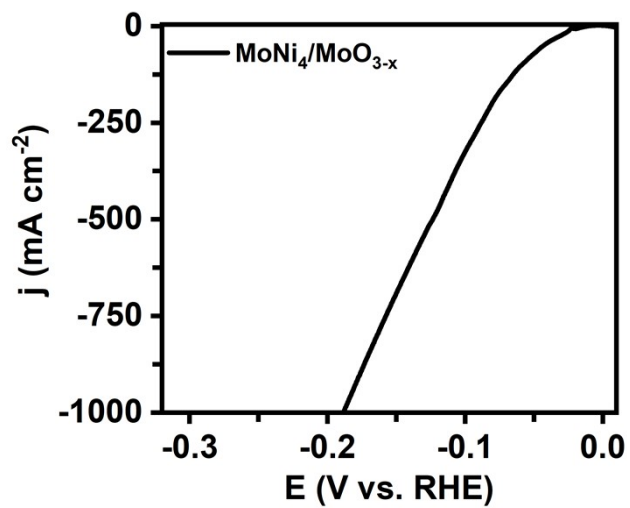

**Fig. S8** (a) FE-SEM of the MoNi<sub>4</sub>/MoO<sub>3-x</sub> for electrocatalyst and (b) LSV HER polarization curve.

**Table S1.** Overpotential comparison for OER catalysts at 500 mA cm<sup>-2</sup> in 1 M KOH

| Catalysts                                 | $\eta_{500}$<br>(mV) | Reference                                  |
|-------------------------------------------|----------------------|--------------------------------------------|
| <b>CoMo-MCA/Fe-NWs/NF</b>                 | <b>300</b>           | <b>This work</b>                           |
| Fe-Co <sub>5.47</sub> N/MoN@NF            | 310                  | Small 2024, 20, 2310535                    |
| NiFe LDH-CeW@NFF                          | 309                  | Appl. Catal. B Environ. 2023, 330, 122612  |
| Te-NiFe <sub>2</sub> O <sub>4</sub> @C/NF | 313                  | Chem. Eng. J. 2023, 464, 142604            |
| Fe,P-NiSe <sub>2</sub> NFs                | 317                  | Adv. Mater. 2021, 33, 2101425              |
| S-(Ni,Fe)OOH                              | 328                  | Energy Environ. Sci. 2020, 13, 3439-3446   |
| NiCoS                                     | 330                  | Appl. Catal. B: Environ. 2021, 291, 120071 |
| Fe-NiCo-LDH/NF                            | 340                  | Adv. Funct. Mater. 2023, 33, 2304403       |

**Table S2.** Overpotential comparison for OER catalysts at 500 mA cm<sup>-2</sup> in 1 M KOH + Sea water

| Catalysts                 | $\eta_{500}$<br>(mV) | References                                 |
|---------------------------|----------------------|--------------------------------------------|
| <b>CoMo-MCA/Fe-NWs/NF</b> | <b>356</b>           | <b>This work</b>                           |
| NiIr-LDH                  | 361                  | J. Am. Chem. Soc., 2022, 144, 9254–9263    |
| NiMoN@NiFeN               | 369                  | Nat. Commun. 2019, 10, 5106                |
| B-Co <sub>2</sub> Fe LDH  | 376                  | Nano Energy 2021, 83, 105838               |
| Ni <sub>3</sub> FeN@C/NF  | 394                  | J. Mater. Chem. A 2021, 9, 13562-13569     |
| S-(Ni,Fe)OOH              | 398                  | Energy Environ. Sci. 2020,13, 3439-3446    |
| NiCoS                     | 440                  | Appl. Catal. B: Environ. 2021, 291, 120071 |

**Table S3.** The comparison of the cell voltage at 500 mA cm<sup>-2</sup> for overall water-splitting activities electrocatalysts in **1 M KOH**.

| Electrolyzers                                                                  | V <sub>500</sub> (V) | References                                |
|--------------------------------------------------------------------------------|----------------------|-------------------------------------------|
| <b>CoMo-MCA/Fe-NWs/NF  <br/>MoNi<sub>4</sub>/MoO<sub>3-x</sub></b>             | <b>1.66</b>          | <b>This work</b>                          |
| Fe <sub>2</sub> P/Ni <sub>1.5</sub> Co <sub>1.5</sub> N/Ni <sub>2</sub> P(+/-) | 1.67                 | ACS Nano 2023, 17, 1681-1692              |
| FeP-Ni <sub>2</sub> P(+/-)                                                     | 1.72                 | Nat. Commun.2018, 9, 2551                 |
| Fe <sub>3</sub> P-NiSe <sub>2</sub> NFs (+/-)                                  | 1.73                 | Adv. Mater. 2021, 33, 2101425             |
| NiMoOx/NiMoS (+/-)                                                             | 1.75                 | Nat. Commun. 2020, 11, 5462               |
| Ni <sub>3</sub> FeN@C  Ni <sub>3</sub> N@C                                     | 1.80                 | J. Mater. Chem. A 2021, 9, 13562-13569    |
| CoPx  CoPx@FeOOH                                                               | 1.833                | Appl. Catal. B Environ. 2021, 294, 120256 |
| Ni <sub>2</sub> P-Fe <sub>2</sub> P/NF                                         | 1.865                | Adv. Funct. Mater. 2021, 31, 2006484      |

**Table S4.** The comparison of the cell voltage at 500 mA cm<sup>-2</sup> for overall water-splitting activities electrocatalysts in **1 M KOH + Seawater**.

| Catalyst                                                                        | V <sub>500</sub> (V) | References                                 |
|---------------------------------------------------------------------------------|----------------------|--------------------------------------------|
| <b>CoMo-MCA/Fe-NWs/NF  <br/>MoNi<sub>4</sub>/MoO<sub>3-x</sub></b>              | <b>1.71</b>          | <b>This work</b>                           |
| Fe <sub>2</sub> P/Ni <sub>1.5</sub> Co <sub>1.5</sub> N/Ni <sub>2</sub> P (+/-) | 1.742                | ACS Nano 2023, 17, 1681-1692               |
| S-(Ni,Fe)OOH   NiMoN                                                            | 1.837                | Energy Environ. Sci. 2020,13, 3439-3446    |
| S,P-(Ni,Mo,Fe)OOH/NiMoP/Wood<br>aerogel (+/-)                                   | 1.861                | Appl. Catal. B Environ. 2021, 293, 120215  |
| CoPx  CoPx@FeOOH                                                                | 1.867                | Appl. Catal. B Environ. 2021, 294, 120256  |
| Ni <sub>3</sub> FeN@C  Ni <sub>3</sub> N@C                                      | 1.91                 | J. Mater. Chem. A 2021, 9, 13562-13569     |
| NiCoS  NiMoS                                                                    | 1.94                 | Appl. Catal. B: Environ. 2021, 291, 120071 |
| Ni <sub>2</sub> P-Fe <sub>2</sub> P/NF(+/-)                                     | 2.004                | Adv. Funct. Mater. 2021, 31, 2006484       |
